# Supplementary material
Source: HighWire-hosted journal article supplement (https://www.jrheum.org/highwire/filestream/32089/field_highwire_adjunct_files/0/161161_Data_Suppl.pdf)
Supplement: 161161_Data_Suppl.pdf [file 161161_Data_Suppl.pdf]

## Supplementary Figure 1. Study design, weeks 0-128.

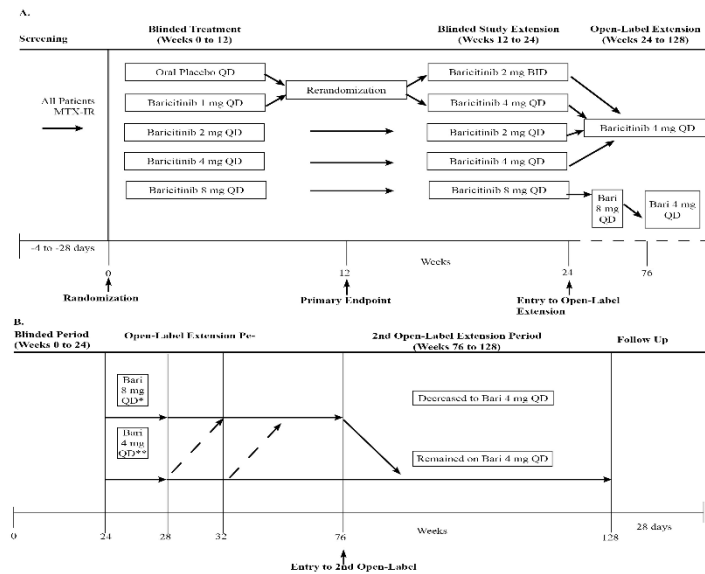

(A) Study design for blinded period (Weeks 0-24). Patients completing Week 24 are eligible to enter the first optional open-label extension (OLE). Patients not entering the OLE proceed to follow-up visit. (B) Study design for first OLE (Weeks 24-76) and second OLE (Weeks 76-128). Patients completing Week 76 are eligible to enter the second optional OLE. Patients not entering the OLE proceed to follow-up visit. Dashed arrow in (B) represents optional dose escalation at Weeks 28 and 32. Patients with  $\geq 6$  tender and  $\geq 6$  swollen joints were eligible for escalation. Solid arrow in (B) represents required dose reduction at Week 76.

**Supplementary Figure 2. Patient disposition, weeks 0-24.**

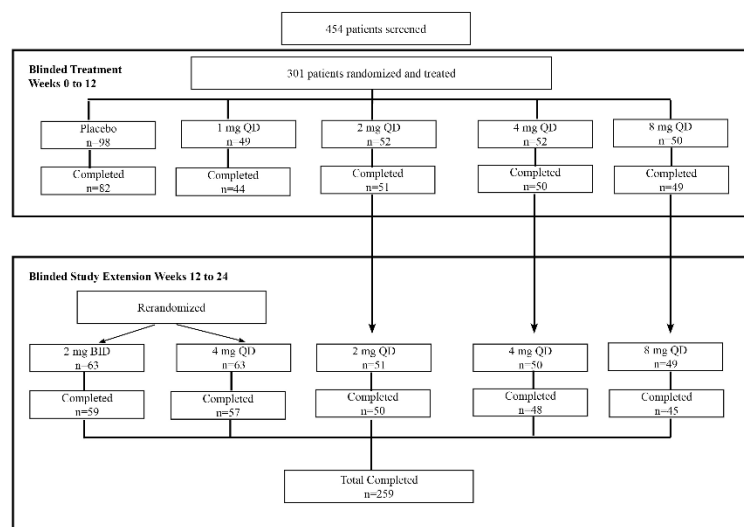

BID: twice-daily; QD: once daily.

**Supplementary Table 1.** Incidence of selected SAE, weeks 0-24, weeks 24-76, and weeks 76-128.

|                                      | Blinded Period<br>Weeks 0-24 |      |       | First OLE<br>Weeks 24-76 |            |             |       | Second OLE<br>Weeks 76-128 |       |     |
|--------------------------------------|------------------------------|------|-------|--------------------------|------------|-------------|-------|----------------------------|-------|-----|
|                                      | Randomized dose              |      |       | 4:8 mg                   |            |             |       | 4/4                        | 4:8/4 | 8/4 |
|                                      | 2 mg                         | 4 mg | 8 mg  | 4 mg                     | Pre-Rescue | Post-Rescue | 8 mg  | mg                         | mg    | mg  |
|                                      | N=5                          | N=5  | N=5   | N=10                     | N=6        | N=6         | N=3   | N=7                        | N=4   | N=1 |
| n (%)                                | 2                            | 2    | 0     | 8                        | 1          | 1           | 2     | 9                          | 7     | 8   |
| Blood and lymphatic system disorders | 0                            | 0    | 2 (4) | 1 (1)                    | 0          | 1 (2)       | 0     | 0                          | 0     | 0   |
| Anemia                               | 0                            | 0    | 1 (2) | 1 (1)                    | 0          | 0           | 0     | 0                          | 0     | 0   |
| Normochromic normocytic anemia       | 0                            | 0    | 0     | 0                        | 0          | 1 (2)       | 0     | 0                          | 0     | 0   |
| Pancytopenia                         | 0                            | 0    | 1 (2) | 0                        | 0          | 0           | 0     | 0                          | 0     | 0   |
| Cardiac disorders                    | 0                            | 0    | 0     | 0                        | 0          | 0           | 1 (3) | 0                          | 0     | 0   |
| Myocardial infarction                | 0                            | 0    | 0     | 0                        | 0          | 0           | 1 (3) | 0                          | 0     | 0   |
| Eye disorders                        | 0                            | 0    | 0     | 2 (2)                    | 0          | 0           | 1 (3) | 0                          | 0     | 0   |

|                                |       |   |       |       |       |       |       |       |       |   |
|--------------------------------|-------|---|-------|-------|-------|-------|-------|-------|-------|---|
| Cataract                       | 0     | 0 | 0     | 2 (2) | 0     | 0     | 0     | 0     | 0     | 0 |
| Ulcerative<br>keratitis        | 0     | 0 | 0     | 0     | 0     | 0     | 1 (3) | 0     | 0     | 0 |
| Gastrointestinal<br>disorders  | 0     | 0 | 1 (2) | 0     | 0     | 2 (3) | 1 (3) | 1 (1) | 0     | 0 |
| General<br>disorders           | 0     | 0 | 0     | 0     | 0     | 0     | 0     | 1 (1) | 0     | 0 |
| Hepatobiliary<br>disorders     | 0     | 0 | 0     | 0     | 0     | 0     | 0     | 1 (1) | 0     | 0 |
| Cholelithiasis                 | 0     | 0 | 0     | 0     | 0     | 0     | 0     | 1 (1) | 0     | 0 |
| Infections and<br>infestations | 2 (4) | 0 | 1 (2) | 5 (5) | 1 (2) | 1 (2) | 2 (6) | 2 (3) | 2 (4) | 0 |
| Acute<br>hepatitis B           | 0     | 0 | 0     | 0     | 0     | 0     | 1 (3) | 0     | 0     | 0 |
| Bronchitis                     | 1 (2) | 0 | 0     | 0     | 0     | 0     | 0     | 0     | 0     | 0 |
| Gastroenteritis                | 0     | 0 | 0     | 1 (1) | 0     | 0     | 0     | 0     | 1 (2) | 0 |
| Gastroenteritis,<br>viral      | 0     | 0 | 0     | 0     | 1 (2) | 0     | 0     | 0     | 0     | 0 |
| Herpes<br>simplex              | 0     | 0 | 0     | 0     | 0     | 1 (2) | 0     | 1 (1) | 0     | 0 |
| Herpes zoster                  | 0     | 0 | 0     | 4 (4) | 0     | 0     | 1 (3) | 1 (1) | 0     | 0 |
| Pneumonia                      | 1 (2) | 0 | 0     | 0     | 0     | 0     | 0     | 0     | 2 (4) | 0 |
| Pneumonia,<br>bacterial        | 0     | 0 | 1 (2) | 0     | 0     | 0     | 0     | 0     | 0     | 0 |

|                  |       |   |   |       |   |       |       |       |       |   |
|------------------|-------|---|---|-------|---|-------|-------|-------|-------|---|
| Injury,          |       |   |   |       |   |       |       |       |       |   |
| poisoning, and   | 1 (2) | 0 | 0 | 2 (2) | 0 | 1 (2) | 0     | 0     | 0     | 0 |
| procedural       |       |   |   |       |   |       |       |       |       |   |
| complications    |       |   |   |       |   |       |       |       |       |   |
| Investigations   | 0     | 0 | 0 | 4 (4) | 0 | 0     | 0     | 0     | 0     | 0 |
| ALT              |       |   |   |       |   |       |       |       |       |   |
| increased        | 0     | 0 | 0 | 2 (2) | 0 | 0     | 0     | 0     | 0     | 0 |
| AST              |       |   |   |       |   |       |       |       |       |   |
| increased        | 0     | 0 | 0 | 1 (1) | 0 | 0     | 0     | 0     | 0     | 0 |
| Blood CPK        |       |   |   |       |   |       |       |       |       |   |
| increased        | 0     | 0 | 0 | 1 (1) | 0 | 0     | 0     | 0     | 0     | 0 |
| Transaminases    | 0     | 0 | 0 | 1 (1) | 0 | 0     | 0     | 0     | 0     | 0 |
| increased        |       |   |   |       |   |       |       |       |       |   |
| Metabolism and   |       |   |   |       |   |       |       |       |       |   |
| nutrition        | 0     | 0 | 0 | 1 (1) | 0 | 0     | 1 (3) | 0     | 1 (2) | 0 |
| disorders        |       |   |   |       |   |       |       |       |       |   |
| Musculoskeleta   |       |   |   |       |   |       |       |       |       |   |
| l and            | 0     | 0 | 0 | 2 (2) | 0 | 1 (2) | 0     | 2 (3) | 0     | 0 |
| connective       |       |   |   |       |   |       |       |       |       |   |
| tissue disorders |       |   |   |       |   |       |       |       |       |   |
| Nervous system   |       |   |   |       |   |       |       |       |       |   |
| disorders        | 0     | 0 | 0 | 1 (1) | 0 | 0     | 1 (3) | 0     | 1 (2) | 0 |
| Pregnancy,       |       |   |   |       |   |       |       |       |       |   |
| puerperium,      | 0     | 0 | 0 | 0     | 0 | 1 (2) | 0     | 0     | 0     | 0 |

|                                                  |       |   |       |       |   |       |   |   |       |   |
|--------------------------------------------------|-------|---|-------|-------|---|-------|---|---|-------|---|
| and perinatal conditions                         |       |   |       |       |   |       |   |   |       |   |
| Psychiatric disorders                            | 0     | 0 | 0     | 0     | 0 | 0     | 0 | 0 | 1 (2) | 0 |
| Renal and urinary disorders                      | 0     | 0 | 1 (2) | 0     | 0 | 0     | 0 | 0 | 0     | 0 |
| Renal failure                                    | 0     | 0 | 1 (2) | 0     | 0 | 0     | 0 | 0 | 0     | 0 |
| Respiratory, thoracic, and mediastinal disorders | 1 (2) | 0 | 0     | 0     | 0 | 1 (2) | 0 | 0 | 0     | 0 |
| Skin and subcutaneous tissue disorders           | 0     | 0 | 0     | 1 (1) | 0 | 0     | 0 | 0 | 0     | 0 |

4/4 mg = 4 mg baricitinib for Weeks 24-76 and Weeks 76-128

4:8/4 = 4 mg baricitinib through Week 28 or 32 then 8 mg through Week 76 and 4 mg for Weeks 76-128. 8/4 mg = 8 mg baricitinib for Weeks 24-76 and 4 mg for Weeks 76-128

Pre-Rescue includes all SAEs that began on or before the date of dose escalation. Post-Rescue includes all SAEs that began after the date of dose escalation. SAEs coded using MedDRA version 16.1. *N* number of patients treated with stated dose regimen in the study period; *n* number of patients with event, OLE open-label extension, *SAE* serious adverse event.

**Supplementary Figure 3.** Mean (LOCF) DAS28-CRP  $\pm$  SE and DAS28-ESR  $\pm$  SE for weeks 24-76 and weeks 76-128.

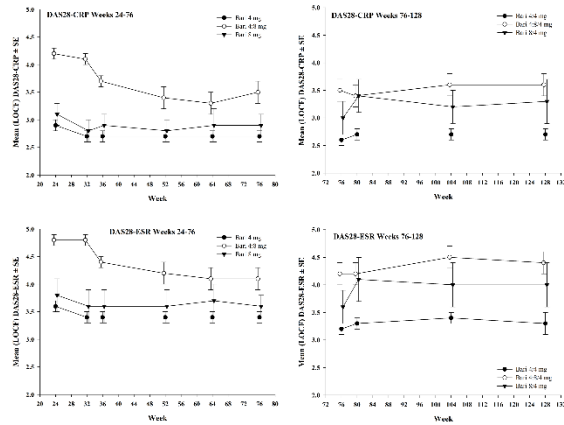

Baricitinib, CRP C-reactive protein, DAS28-CRP Disease Activity Score for 28-joint counts based on the CRP level, DAS28-ESR Disease Activity Score for 28-joint counts based on the ESR, ESR erythrocyte sedimentation rate, LOCF last observation carried forward, SE standard error.

**Supplementary Figure 4.** Mean (LOCF) CDAI  $\pm$  SE and SDAI  $\pm$  SE for weeks 24-76 and weeks 76-128.

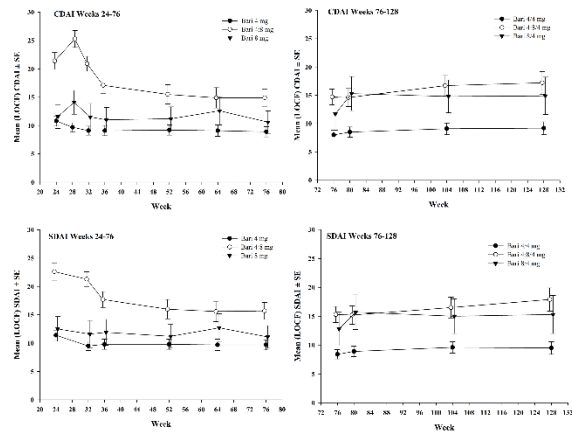

Baricitinib, CDAI Clinical Disease Activity Index, LOCF last observation carried forward, SDAI Simplified Disease Activity Index, SE standard error.
